# Supplementary material for: Energy Profiles of Nine Water Treatment Plants in the Salt Lake City Area of Utah and Implications for Planning, Design, and Operation
Source: Atypon-hosted journal article supplement (doi:10.1061/(asce)ee.1943-7870.0001888), 2021-05-13
Supplement: supplemental_materials_ee.1943-7870.0001888_sowby.pdf [file supplemental_materials_ee.1943-7870.0001888_sowby.pdf]

## SUPPLEMENTAL MATERIALS

*ASCE Journal of Environmental Engineering*

# Energy Profiles of Nine Water Treatment Plants in the Salt Lake City Area of Utah and Implications for Planning, Design, and Operation

Robert B. Sowby and Matthew J. Thompson

**DOI:** 10.1061/(ASCE)EE.1943-7870.0001888

© ASCE 2021

[www.ascelibrary.org](http://www.ascelibrary.org)

## Benchmarking Example

The following calculation demonstrates how the regression model could be used for benchmarking a facilities energy use relative to others. It involves computing the theoretical energy use or energy intensity and then examining the ratio of actual energy use or energy intensity by the predicted energy use or energy intensity.

Regression Model:

$$y = \beta_0 + \beta_1 * x_1 + \dots + \beta_n * x_n$$

Where

$y$  is the predicted variable (i.e., natural log of energy use or energy intensity)

$\beta_0$  is the model intercept

$\beta_n$  is the  $n^{\text{th}}$  model coefficient

$x_n$  is the  $n^{\text{th}}$  input variable for the  $n^{\text{th}}$  model coefficient

Consider the energy intensity (Model 1) for Site A given its first month's data. Predicted energy intensity is:

$$y = \ln(En) = 4.88 + 0.52 * (\ln(wp)) - 1.19 * (dc) + 3.82 * 10^{-5} * (FAm2) + 1.62 * 10^{-3} * (HDD) \\ - 0.63 * (phyp) - 0.54 * (pgas) + 0.18 * (poz) + 0.41 * (puv)$$

Where

$\ln(En)$  is the natural logarithm of predicted energy use

$\ln(wp)$  is the natural logarithm of water production ( $\text{m}^3$ )

$dc$  is percent design capacity, monthly flow divided by plant capacity (%)

*FAm2* is the climate-controlled floor area (m<sup>2</sup>)

*HDD* is Heating Degree Days (base 18° C)

*phyp* is an indicator variable for use of sodium hypochlorite (yes = 1, no = 0)

*pgas* is an indicator variable for use of gaseous chlorine (yes = 1, no = 0)

*poz* is an indicator variable use of ozone (yes = 1, no = 0)

*puv* is an indicator variable use of ultraviolet disinfection (yes = 1, no = 0)

Then

$$\begin{aligned}y = \ln(En) &= 4.88 + 0.52 * (\ln(3,781,851)) - 1.19 * (0.20) + +3.82 * 10^{-5} * (23,900) \\ &+ 1.62 * 10^{-3} * (561) - 0.63 * (0) - 0.54 * (0) + 0.18 * (1) + 0.41 * (0) \\ &= 14.5196\end{aligned}$$

Predicted energy use:  $En = \exp(14.5196) = 2,021,957$  kWh

Actual energy use: 2,449,292 kWh

Ratio of actual energy use to average:  $2,449,292 \text{ kWh} / 2,021,957 \text{ kWh} = 1.21$  (21% higher energy use relative to average)

Result of taking averages across all data for each facility are shown in Table S1 below. Sites C, D, and G are on average exhibiting a higher energy intensity relative to other facilities. Sites H and I exhibited relatively lower energy intensities.

**Table S1.** Resulting Energy Intensity Ratio of Facilities

| Site | Average Ratio |
|------|---------------|
| A    | 5%            |
| B    | 1%            |
| C    | 20%           |
| D    | 57%           |
| E    | 5%            |
| F    | 5%            |
| G    | 34%           |
| H    | -31%          |
| I    | -27%          |

**Survey Spreadsheet**

Data for this study were collected using the spreadsheet form shown in Fig. S1.

| GENERAL INFO                                                                                 |    |                         |  |
|----------------------------------------------------------------------------------------------|----|-------------------------|--|
| Plant Name                                                                                   |    |                         |  |
| Water Source(s)                                                                              |    |                         |  |
| Preparer Name                                                                                |    | Date                    |  |
| PROCESSES                                                                                    |    |                         |  |
| Plant capacity (MGD)                                                                         |    |                         |  |
| Water Source                                                                                 |    |                         |  |
| Gravity surface water                                                                        | No |                         |  |
| Pumped surface water                                                                         | No | Approx. head added (ft) |  |
| Clarification                                                                                |    |                         |  |
| Rapid mixing                                                                                 | No |                         |  |
| Flocculation                                                                                 | No |                         |  |
| Sedimentation                                                                                | No |                         |  |
| Microfiltration (in place of sedimentation)                                                  | No |                         |  |
| Ultrafiltration                                                                              | No |                         |  |
| Dissolved air flotation                                                                      | No |                         |  |
| Air stripping                                                                                | No |                         |  |
| Repumping within treatment plant                                                             | No |                         |  |
| Filtration & Solids Handling                                                                 |    |                         |  |
| Backwash water pumps                                                                         | No |                         |  |
| Residuals pumping                                                                            | No |                         |  |
| Thickened solids pumping                                                                     | No |                         |  |
| Disinfection & Pumping                                                                       |    |                         |  |
| Onsite chlorine generation                                                                   | No |                         |  |
| Ozone disinfection                                                                           | No |                         |  |
| Ultraviolet disinfection                                                                     | No |                         |  |
| Finished water pumping                                                                       | No | Approx. head added (ft) |  |
| Other Facilities and Processes                                                               |    |                         |  |
| Other processes: Please explain                                                              |    |                         |  |
| Other major facilities (e.g., pump station) on same electric meter(s) but not part of plant? |    |                         |  |
| Please explain                                                                               |    |                         |  |

**Fig. S1.** Survey spreadsheet.

| ENERGY AND PRODUCTION DATA                                                            |       |                  |                     |
|---------------------------------------------------------------------------------------|-------|------------------|---------------------|
| Year 1                                                                                | Month | Energy Use (kWh) | Finished Water (MG) |
| 20xx                                                                                  | 1     |                  |                     |
|                                                                                       | 2     |                  |                     |
|                                                                                       | 3     |                  |                     |
|                                                                                       | 4     |                  |                     |
|                                                                                       | 5     |                  |                     |
|                                                                                       | 6     |                  |                     |
|                                                                                       | 7     |                  |                     |
|                                                                                       | 8     |                  |                     |
|                                                                                       | 9     |                  |                     |
|                                                                                       | 10    |                  |                     |
|                                                                                       | 11    |                  |                     |
|                                                                                       | 12    |                  |                     |
| Year 2                                                                                | Month | Energy Use (kWh) | Finished Water (MG) |
| 20xx                                                                                  | 1     |                  |                     |
|                                                                                       | 2     |                  |                     |
|                                                                                       | 3     |                  |                     |
|                                                                                       | 4     |                  |                     |
|                                                                                       | 5     |                  |                     |
|                                                                                       | 6     |                  |                     |
|                                                                                       | 7     |                  |                     |
|                                                                                       | 8     |                  |                     |
|                                                                                       | 9     |                  |                     |
|                                                                                       | 10    |                  |                     |
|                                                                                       | 11    |                  |                     |
|                                                                                       | 12    |                  |                     |
| Year 3                                                                                | Month | Energy Use (kWh) | Finished Water (MG) |
| 20xx                                                                                  | 1     |                  |                     |
|                                                                                       | 2     |                  |                     |
|                                                                                       | 3     |                  |                     |
|                                                                                       | 4     |                  |                     |
|                                                                                       | 5     |                  |                     |
|                                                                                       | 6     |                  |                     |
|                                                                                       | 7     |                  |                     |
|                                                                                       | 8     |                  |                     |
|                                                                                       | 9     |                  |                     |
|                                                                                       | 10    |                  |                     |
|                                                                                       | 11    |                  |                     |
|                                                                                       | 12    |                  |                     |
| NOTES                                                                                 |       |                  |                     |
| Notable water quality issues, unusual processes or operations, data limitations, etc. |       |                  |                     |
|                                                                                       |       |                  |                     |

Fig. 1. (Continued.)

## Model Fit

Fig. S2 shows model fit for the four regression models by comparing predicted and observed energy use.

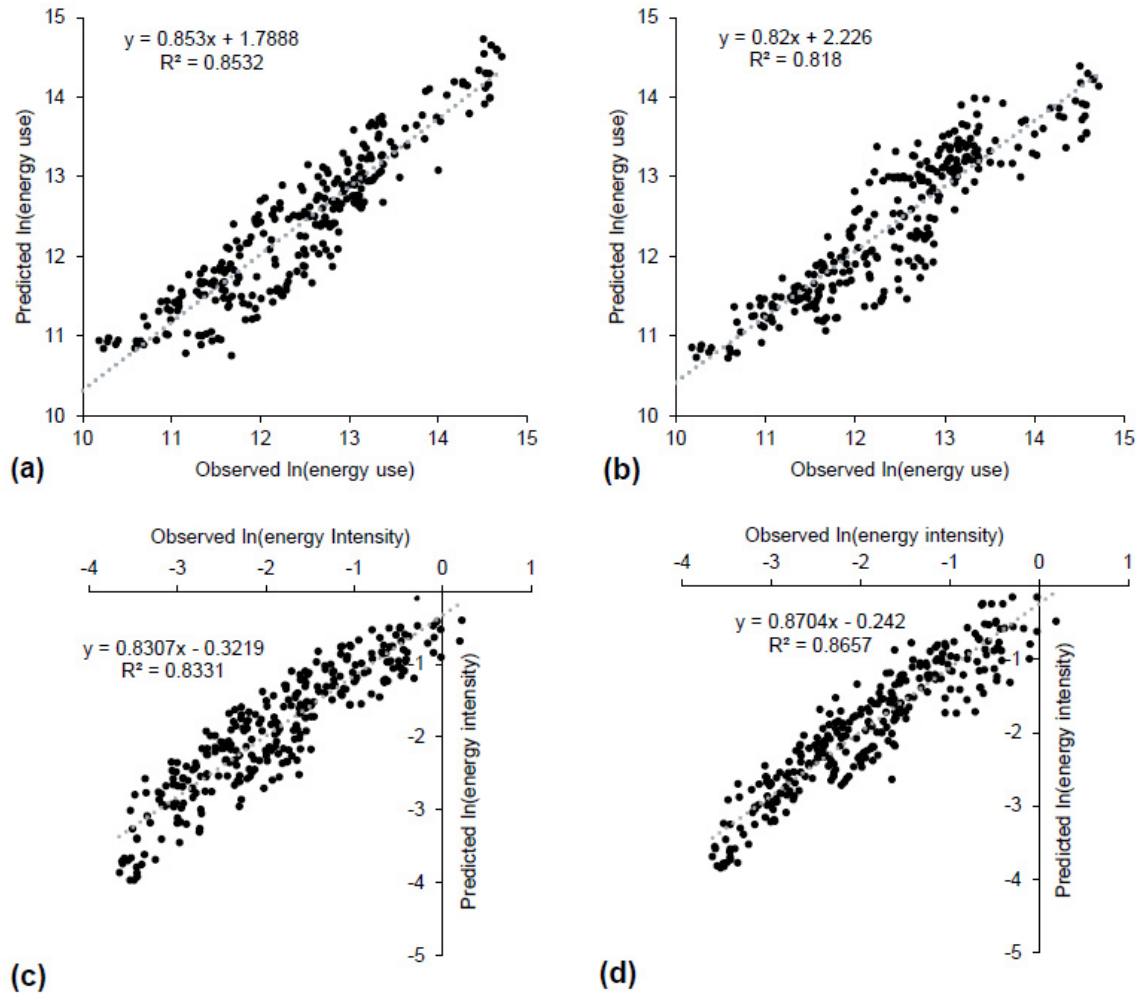

**Fig. S2.** Fit of energy use and energy intensity models: (a) Model 1, (b) Model 2, (c) Model 3, (d) Model 4.
